# Supplementary material
Source: PubMed Central journal article supplement (PMC3296241)
Supplement: supp_111.136804_TableS2.pdf [file supp_111.136804_TableS2.pdf]

**Table S2** *sao-1* mutations do not suppress the Egl defect of *sel-12*

| Genotype                       | % Egg laying proficiency (n) |                   |                      |
|--------------------------------|------------------------------|-------------------|----------------------|
|                                | <i>sao-1(+)</i>              | <i>sao-1(ik1)</i> | <i>sao-1(ok3335)</i> |
| <i>se1-12(ty11)</i>            | 0 (101)                      | 0 (103)           | 0 (89)               |
| <i>se1-12(171)<sup>a</sup></i> | 0 (98)                       | 1 (104)           | 0 (95)               |
| <i>se1-12(131)<sup>a</sup></i> | 0 (96)                       | 4.2 (119)         | 0 (96)               |

Hermaphrodites that were homozygous for either *sao-1(+)*, *sao-1(ik1)*, or *sao-1(ok3335)* and also had the indicated *sel-12* genotype were scored for egg laying proficiency. Egg laying proficiency is defined as active laying for at least two consecutive days. n, number of animals scored. ND, not determined.

*a* For comparison: Egg laying proficiency is observed among 20% of *sel-10(ar41)*; *sel-12(171)* animals and 75% of *sel-10(ar41)*; *sel-12(131)* animals (Wu *et al.* 1998).
