# Supplementary material
Source: PubMed Central journal article supplement (PMC3296241)
Supplement: supp_111.136804_TableS3.pdf [file supp_111.136804_TableS3.pdf]

**Table S3** *sao-1(ik1)* does not improve the uterine  $\pi$  cell defect caused by *sel-12(ar171)*

| Genotype                                     | Uterine $\pi$ cells/side (n) |
|----------------------------------------------|------------------------------|
| <i>sao-1(+); sel-12(+)</i>                   | 6.05 (38)                    |
| <i>sel-12(ar171)<sup>a</sup></i>             | 0.11 (56)                    |
| <i>sao-1(ik1); sel-12(ar171)<sup>a</sup></i> | 0.09 (56)                    |

The average number of uterine  $\pi$  cells per side was determined for mid L4 stage hermaphrodites (Christmas-tree stage) of the indicated genotypes. All strains contained the integrated  $\pi$ -cell specific marker *cog-2::gfp* (HANNA-ROSE and HAN 1999). n, number of animals scored; only one side was counted per animal. <sup>a</sup> *sel-12(ar171)* animals were also homozygous for the marker *unc-1(e538)*.
